# Supplementary material
Source: Springer Nature journal article supplement (https://www.springermedizin.de/resource/supplementary/12885_2010_2697_MOESM4_ESM.pdf/9461742)
Supplement: MOESM4 [file 9461742]

-----Hepa-1 c4----- -----Hepa-1 WT---

**A**

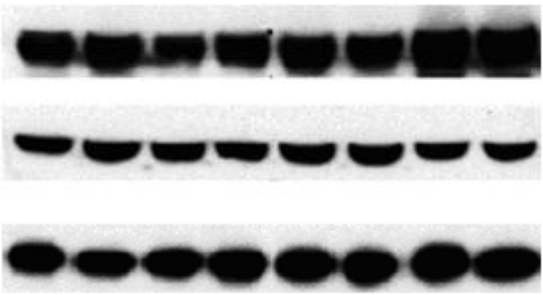

Phospho Akt (1:1000)

Akt (1:1000)

actin (1:1000)

**B**

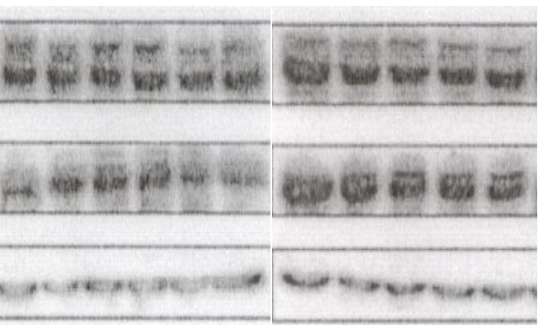

cMyc(1:1000)

Phospho cMyc (1:1000)

actin (1:1000)

**C**

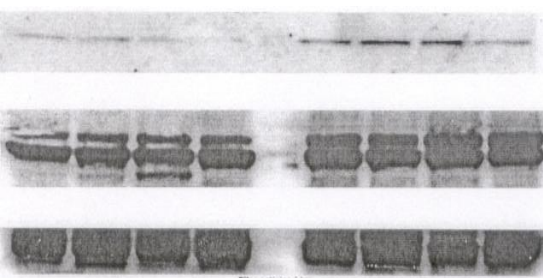

LDH (1:500)

PK (1:500)

actin (1:1000)

**D**

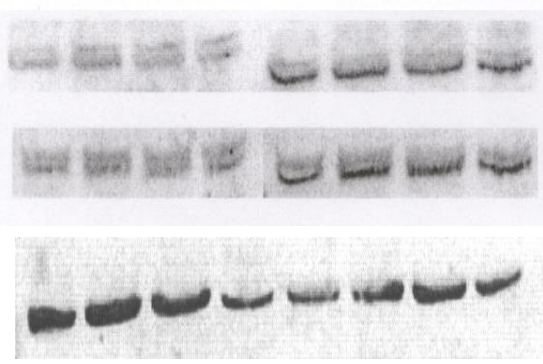

PDK-1

PDK-2

E1α

**E**

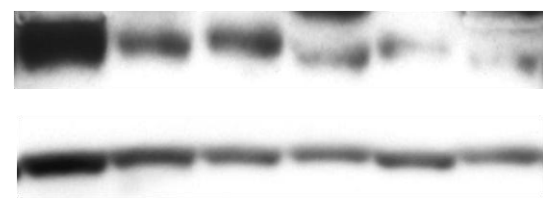

Phospho AMPK (1:1500)

actin (1:1000)
